# Supplementary material
Source: PubMed Central journal article supplement (PMC4886343)

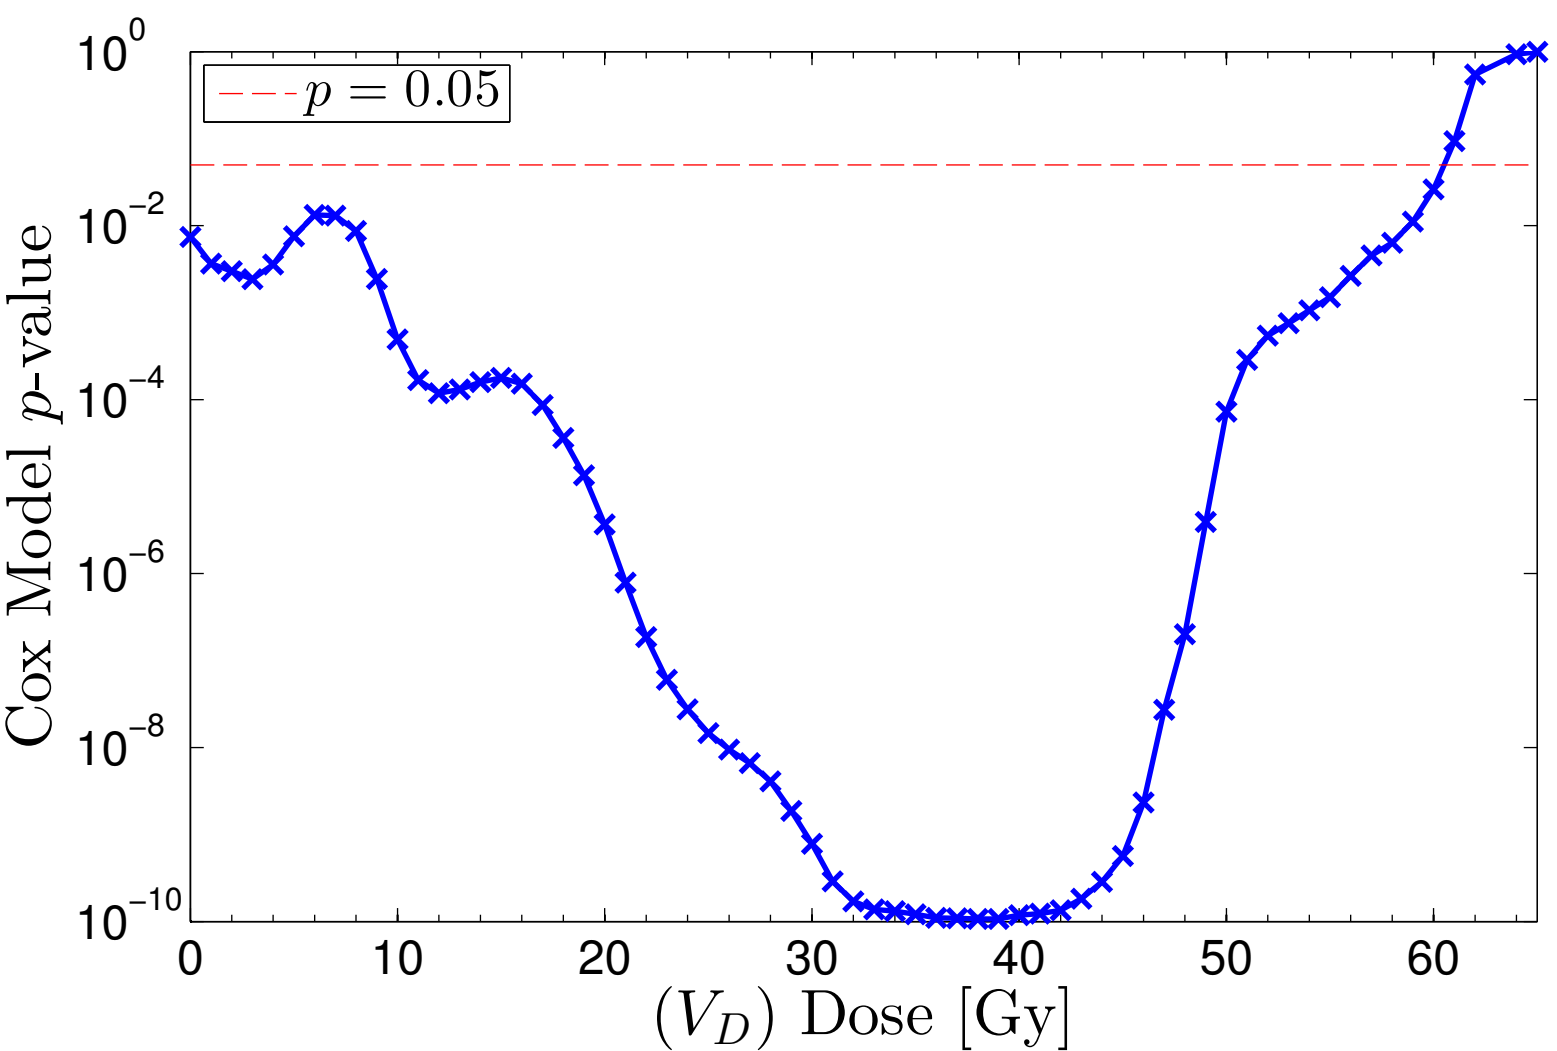

Supplement: NIHMS783640-supplement-9.pdf [file NIHMS783640-supplement-9.pdf]
